# Supplementary material
Source: publisher figshare collection journal article supplement (https://acs.figshare.com/ndownloader/files/8683534)
Supplement: Supplementary file 1 [file 8683534]

## Supporting information

Hollow Rod-like  $\text{MgF}_2$  with Ultra-low Refractive Index for Preparation of Multifunctional Antireflective Coatings

*Lei Bao, Zihan Ji, Hongning Wang, Ruoyu Chen\**

No. 1, Gehu Road, Changzhou, Jiangsu, 213164, PR China

\*E-mail: cxdery@163.com

S1:  $\text{SiO}_2$ - $\text{MgF}_2$  double coatings' mechanical properties. (a) Acoustic emission spectrum of scratches between the coatings and the substrate. (b) Scratches by 6 H pencil on the surface of the coatings.

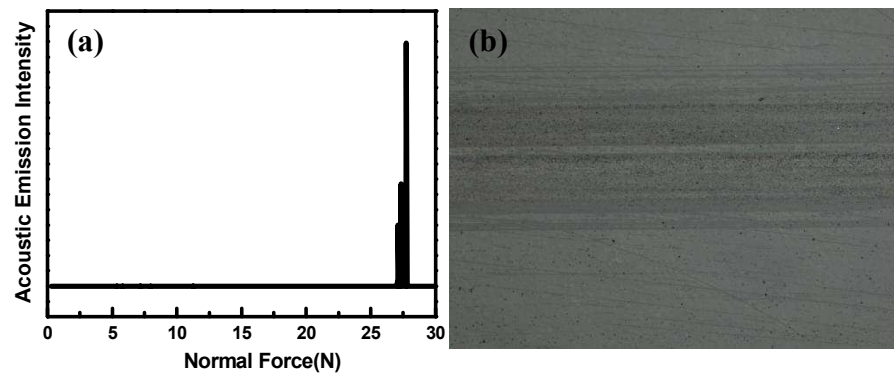

S1 SiO<sub>2</sub>-MgF<sub>2</sub> double coatings' mechanical properties. (a) Acoustic emission spectrum of scratches between the coatings and the substrate. (b) Scratches by 6 H pencil on the surface of the coatings.
